# Supplementary material
Source: publisher site journal article supplement (https://www.dovepress.com/article/supplementary_file/614976/614976%20Supplementary%20Material.docx)
Supplement: Supplementary file 1 [file 614976%20Supplementary%20Material.docx]

**Supplementary Materials**

**Methods**

**CT imaging evaluation**

The bronchiectasis and mucus plugs were evaluated manually, referring to our previous research. Bronchiectasis (referred to as bronchiectasis sign instead of bronchiectasis disease) was defined with the following CT signs: lack of tapering of the bronchial lumen when extending towards the periphery, the internal diameter of the bronchi exceeding that of the accompanying pulmonary artery, and the presence of peripheral bronchi within 1 cm of the pleura. Mucus plugs were defined as complete occlusion of the airway by mucus. The lung was divided into 20 pulmonary segments. The bronchiectasis score (BE score) and the mucus plugs score (MUC score) referred to the number of pulmonary segments involved in bronchiectasis or mucus plugs. Bronchiectasis severity included 0-3 levels, with 0 for no bronchiectasis, 1 for partial noncontinuous, 2 for diffuse continuous, and 3 for diffuse continuous lesions that extended to the subpleural area. The distribution pattern of bronchiectasis included central (only bronchi ≤4th generation involved), peripheral (only bronchi >5th generation involved), and mixed distribution (both central and peripheral bronchi were involved). The severity of the mucus plugs was divided into zero (MUC score=0), low (MUC score between 0.5 and 3.5), and high (MUC score>3.5) levels.

**Inclusion and exclusion criteria of the asthma patients**

The inclusion criteria were as follows: (1) meeting the diagnostic criteria of asthma according to the Global Initiative for Asthma 2014 guideline, (2) >18 years old, and (3) at least six months of regular treatment (inhaled corticosteroid (ICS) combined with beta2-agonist and/or leukotriene receptor antagonist). Exclusion criteria were as follows: (1) smoking history, (2) an acute exacerbation phase of asthma or rhinitis, (3) systemic corticosteroid or antibiotic treatment within 2 weeks, and (4) complications of other chronic respiratory diseases such as COPD, CF, bronchiectasis disease, and allergic bronchopulmonary aspergillosis.

**Inclusion and exclusion criteria of the healthy controls**

Hospital non-clinical staff were recruited as healthy controls based on the following criteria: (1) >18 years old, (2) without any chronic nasal or respiratory diseases, (3) without respiratory infections within 2 weeks, and (4) without a history of smoking or allergy.

**Tables**

**Table S1** Updated taxonomic names of the bacterial microorganism according to the Silva138.2/16s bacteria database

| Previous name | New name |
| --- | --- |
| *Firmicutes* | *Bacillota* |
| *Proteobacteria* | *Pseudomonadota* |
| *Actinobacteria* | *Actinomycetota* |
| *Bacteroidetes* | *Bacteroidota* |

**Table S2** A post-hoc sensitivity power analysis

| Analysis type | Effect size | Calculated minimum value of effect size (Magnitude)# | Variables (Actual effect size of the main positive results) |
| --- | --- | --- | --- |
| Subgroup comparisons |  |  |  |
| Control vs. Asthma | r= | 1.023 (Large) | Bacterial load (0.604) |
| Cluster 1 vs. Cluster 2 | r= | 1.158 (Large) | Chao index (0.601)  Shannon index (0.601)  Bronchiectasis score (0.488)  LAA%-910(0.385) |
| Non-MUC vs. MUC group | r= | 1.151 (Large) | Bacterial load (0.514) |
| Correlations | Correlation coefficient r | 0.509 (Moderate-large) | See Figure 3 for details |
| Linear regressions | R2 | 0.240 (Moderate-large) | See Figure 4 for details |

**Notes:** #: The minimum effect size was calculated with 80% power at a two-tailed α=0.05 by G*Power (version 3.1.9.7).

**Table S3** Demographic characteristics of the healthy controls and asthmatic patients enrolled in the study

| Characteristics | Control (n=12) | Asthma (n=27) | *P* value |
| --- | --- | --- | --- |
| Gender, n (%) |  |  | 0.006 |
| male | 9 (75.0) | 7 (25.9) |  |
| female | 3 (25.0) | 20 (74.1) |  |
| Age, years | 24.33 ± 1.50 | 40.37 ± 13.73 | < 0.001 |
| BMI, kg/m2 | 21.35 ± 3.21 | 22.06 ± 2.74 | 0.486 |

**Abbreviations:** BMI, body mass index.

**Table S4** Multiple linear regression analysis of variables affecting bacterial load and microbiota dysbiosis index in the nasal lavage fluid

| Variables | Bacterial load [log10 (copies/μL)] | | | | MDI | | | | |
| --- | --- | --- | --- | --- | --- | --- | --- | --- | --- |
|  | B | SE | Beta | *P* value | B | SE | Beta | *P* value |
| Male/Female | -0.613 | 0.321 | -0.285 | 0.064 | 0.189 | 0.218 | 0.127 | 0.392 |
| Age, years | -0.004 | 0.012 | -0.045 | 0.776 | 0.025 | 0.008 | 0.468 | 0.005 |
| Control/Asthma | 1.659 | 0.394 | 0.724 | < 0.001 | 0.273 | 0.268 | 0.172 | 0.315 |
| Adjusted R2 | 0.336 | | | | 0.356 | | | | |

**Abbreviations:** B, regression coefficient; Beta, standardized regression coefficient; MDI, Microbial Dysbiosis index; SE, standard error.

**Table S5** The genus list used for microbial dysbiosis index calculation

| Number | Feature | Relative abundance in asthma | Relative abundance in healthy control | Fold change | State in asthma |
| --- | --- | --- | --- | --- | --- |
| 1 | g__unclassified_f__Veillonellaceae | 0.00115886245234 | 0.00002328071891 | 49.77777777777770 | increased |
| 2 | g__Peptostreptococcus | 0.00513210514607 | 0.00020952647018 | 24.49382716049380 | increased |
| 3 | g__Solobacterium | 0.00207974422250 | 0.00010476323509 | 19.85185185185180 | increased |
| 4 | g__Parvimonas | 0.00490447145008 | 0.00029100898636 | 16.85333333333330 | increased |
| 5 | g__Anaeroglobus | 0.00254018510758 | 0.00015132467291 | 16.78632478632470 | increased |
| 6 | g__unclassified_f__Peptostreptococcaceae | 0.00132441423124 | 0.00008148251618 | 16.25396825396820 | increased |
| 7 | g__Stomatobaculum | 0.00099331067343 | 0.00006984215673 | 14.22222222222220 | increased |
| 8 | g__Rhodococcus | 0.00107608656289 | 0.00008148251618 | 13.20634920634920 | increased |
| 9 | g__unclassified_k__norank_d__Bacteria | 0.00121577087634 | 0.00010476323509 | 11.60493827160490 | increased |
| 10 | g__Peptococcus | 0.00101400464580 | 0.00009312287563 | 10.88888888888880 | increased |
| 11 | g__Acinetobacter | 0.01907984251887 | 0.00197886110723 | 9.64183006535947 | increased |
| 12 | g__Moraxella | 0.03357597015929 | 0.00381803790101 | 8.79403794037940 | increased |
| 13 | g__Oribacterium | 0.00153135395488 | 0.00017460539181 | 8.77037037037037 | increased |
| 14 | g__Dialister | 0.00568566890679 | 0.00065186012944 | 8.72222222222222 | increased |
| 15 | g__unclassified_f__Comamonadaceae | 0.00142271059997 | 0.00017460539181 | 8.14814814814814 | increased |
| 16 | g__Hoylesella | 0.00967443207980 | 0.00121059738325 | 7.99145299145299 | increased |
| 17 | g__Aerococcus | 0.00137097566906 | 0.00017460539181 | 7.85185185185185 | increased |
| 18 | g__Hydrogenophilus | 0.00054839026762 | 0.00008148251618 | 6.73015873015873 | increased |
| 19 | g__unclassified_f__Lachnospiraceae | 0.00115368895925 | 0.00017460539181 | 6.60740740740740 | increased |
| 20 | g__Vulcaniibacterium | 0.00355936324647 | 0.00055873725381 | 6.37037037037037 | increased |
| 21 | g__norank_o__Clostridia_UCG-014 | 0.00086397334616 | 0.00013968431345 | 6.18518518518518 | increased |
| 22 | g__Sphingomonas | 0.00207457072941 | 0.00037249150254 | 5.56944444444444 | increased |
| 23 | g__Actinobacillus | 0.01108679569358 | 0.00206034362341 | 5.38104205900816 | increased |
| 24 | g__Deinococcus | 0.00360592468429 | 0.00074498300508 | 4.84027777777777 | increased |
| 25 | g__Rothia | 0.00630648807769 | 0.00131536061834 | 4.79449360865290 | increased |
| 26 | g__Catonella | 0.00189349847123 | 0.00040741258090 | 4.64761904761904 | increased |
| 27 | g__[Eubacterium]_sulci_group | 0.00125198532797 | 0.00031428970527 | 3.98353909465020 | increased |
| 28 | g__Pseudomonas | 0.00756364689875 | 0.00190901895051 | 3.96205962059620 | increased |
| 29 | g__Psychrobacter | 0.00099331067343 | 0.00025608790799 | 3.87878787878787 | increased |
| 30 | g__Fusobacterium | 0.00975720796925 | 0.00253759836104 | 3.84505606523955 | increased |
| 31 | g__Porphyromonas | 0.02548980045837 | 0.00678632956186 | 3.75605107680579 | increased |
| 32 | g__Dolosigranulum | 0.03598681793960 | 0.01063928854123 | 3.38244590323364 | increased |
| 33 | g__Nesterenkonia | 0.00279368626903 | 0.00086138659962 | 3.24324324324324 | increased |
| 34 | g__Mogibacterium | 0.00093640224943 | 0.00029100898636 | 3.21777777777777 | increased |
| 35 | g__Brevundimonas | 0.00123646484870 | 0.00039577222145 | 3.12418300653594 | increased |
| 36 | g__Schaalia | 0.00159860936506 | 0.00052381617544 | 3.05185185185185 | increased |
| 37 | g__Halomonas | 0.08505739990584 | 0.02835591563067 | 2.99963510308337 | increased |
| 38 | g__Filifactor | 0.00070876855344 | 0.00024444754854 | 2.89947089947089 | increased |
| 39 | g__unclassified_f__Micrococcaceae | 0.00287128866539 | 0.00100107091307 | 2.86821705426356 | increased |
| 40 | g__Capnocytophaga | 0.00441816309954 | 0.00157144852633 | 2.81152263374485 | increased |
| 41 | g__norank_f__Neisseriaceae | 0.00431469323773 | 0.00164129068306 | 2.62884160756501 | increased |
| 42 | g__Rubrobacter | 0.00063633965017 | 0.00024444754854 | 2.60317460317460 | increased |
| 43 | g__Megasphaera | 0.00089501430471 | 0.00036085114308 | 2.48028673835125 | increased |
| 44 | g__Stenotrophomonas | 0.00080189142907 | 0.00032593006472 | 2.46031746031746 | increased |
| 45 | g__Methylorubrum | 0.00274195133812 | 0.00114075522652 | 2.40362811791383 | increased |
| 46 | g__Alloprevotella | 0.00151065998251 | 0.00065186012944 | 2.31746031746031 | increased |
| 47 | g__norank_f__Prevotellaceae | 0.00566497493443 | 0.00268892303394 | 2.10678210678210 | increased |
| 48 | g__norank_f__Lachnospiraceae | 0.00026902164072 | 0.00012804395400 | 2.10101010101010 | increased |
| 49 | g__Leptotrichia | 0.00158826237888 | 0.00075662336453 | 2.09914529914529 | increased |
| 50 | g__Bergeyella | 0.00118472991779 | 0.00057037761326 | 2.07709750566893 | increased |
| 51 | g__unclassified_f__Bacillaceae | 0.00016555177891 | 0.00008148251618 | 2.03174603174603 | increased |
| 52 | g__Massilia | 0.00156239491342 | 0.00077990408344 | 2.00331674958540 | increased |
| 53 | g__Sphingobacterium | 0.00022763369600 | 0.00011640359454 | 1.95555555555555 | increased |
| 54 | g__Chryseobacterium | 0.00033627705090 | 0.00017460539181 | 1.92592592592592 | increased |
| 55 | g__Corynebacterium | 0.07226335149229 | 0.03892536201518 | 1.85645933014354 | increased |
| 56 | g__Gemella | 0.00893462256781 | 0.00495879312753 | 1.80177360459050 | increased |
| 57 | g__Campylobacter | 0.00486825699844 | 0.00271220375285 | 1.79494515975202 | increased |
| 58 | g__Lautropia | 0.00123129135561 | 0.00071006192671 | 1.73406193078324 | increased |
| 59 | g__unclassified_f__Rhizobiaceae | 0.00395772221446 | 0.00237463332868 | 1.66666666666666 | increased |
| 60 | g__Hornefia | 0.00044492040581 | 0.00026772826745 | 1.66183574879227 | increased |
| 61 | g__Olsenella | 0.00005690842400 | 0.00003492107836 | 1.62962962962962 | increased |
| 62 | g__Pelagibacterium | 0.01063670179468 | 0.00762443544257 | 1.39508057675996 | increased |
| 63 | g__Johnsonella | 0.00045009389890 | 0.00032593006472 | 1.38095238095238 | increased |
| 64 | g__Neisseria | 0.01878495341269 | 0.01389858918843 | 1.35157267820584 | increased |
| 65 | g__Veillonella | 0.00956061523180 | 0.00719374214276 | 1.32901833872707 | increased |
| 66 | g__Segatella | 0.00100365765962 | 0.00075662336453 | 1.32649572649572 | increased |
| 67 | g__norank_o__Saccharimonadales | 0.00012933732727 | 0.00010476323509 | 1.23456790123456 | increased |
| 68 | g__Actinomyces | 0.00143305758615 | 0.00117567630488 | 1.21892189218921 | increased |
| 69 | g__Chelativorans | 0.00138132265524 | 0.00114075522652 | 1.21088435374149 | increased |
| 70 | g__Streptococcus | 0.05485972073484 | 0.04560692834195 | 1.20288128863932 | increased |
| 71 | g__Granulicatella | 0.00718080841003 | 0.00606462727569 | 1.18404777137982 | increased |
| 72 | g__unclassified_f__Enterobacteriaceae | 0.03641621786614 | 0.03234855892350 | 1.12574467234416 | increased |
| 73 | g__unclassified_f__Pasteurellaceae | 0.01759505000181 | 0.01591237137403 | 1.10574656587824 | increased |
| 74 | g__Finegoldia | 0.01188868712266 | 0.01125622759231 | 1.05618752154429 | increased |
| 75 | g__Prevotella | 0.00893979606090 | 0.00864878707454 | 1.03364737550471 | increased |
| 76 | g__Aliihoeflea | 0.00133476121743 | 0.00138520277506 | 0.96358543417367 | decreased |
| 77 | g__Methylobacterium | 0.00103987211125 | 0.00112911486707 | 0.92096219931271 | decreased |
| 78 | g__Enhydrobacter | 0.00526144247334 | 0.00599478511896 | 0.87766990291262 | decreased |
| 79 | g__Sphingopyxis | 0.00033627705090 | 0.00040741258090 | 0.82539682539683 | decreased |
| 80 | g__Staphylococcus | 0.22615925046432 | 0.28305862085021 | 0.79898379277415 | decreased |
| 81 | g__Tannerella | 0.00030523609236 | 0.00040741258090 | 0.74920634920635 | decreased |
| 82 | g__Pseudoxanthomonas | 0.00004138794473 | 0.00005820179727 | 0.71111111111111 | decreased |
| 83 | g__Butyrivibrio | 0.00016037828581 | 0.00024444754854 | 0.65608465608466 | decreased |
| 84 | g__unclassified_o__Lactobacillales | 0.00137614916215 | 0.00223494901523 | 0.61574074074074 | decreased |
| 85 | g__Cloacibacterium | 0.00006208191709 | 0.00010476323509 | 0.59259259259259 | decreased |
| 86 | g__Lachnoanaerobaculum | 0.00068807458108 | 0.00124551846161 | 0.55244029075805 | decreased |
| 87 | g__Sphingobium | 0.00013451082036 | 0.00024444754854 | 0.55026455026455 | decreased |
| 88 | g__Haemophilus | 0.03031149601900 | 0.05870233272803 | 0.51635930993456 | decreased |
| 89 | g__Anoxybacillus | 0.00057943122617 | 0.00115239558598 | 0.50280583613917 | decreased |
| 90 | g__Lawsonella | 0.00471822569881 | 0.01025515667924 | 0.46008323874385 | decreased |
| 91 | g__Negativicoccus | 0.00277299229667 | 0.00675140848349 | 0.41072796934866 | decreased |
| 92 | g__Paracoccus | 0.00039318547490 | 0.00098943055362 | 0.39738562091503 | decreased |
| 93 | g__Anaerococcus | 0.06281137961540 | 0.15841365181357 | 0.39650231464472 | decreased |
| 94 | g__Cutibacterium | 0.00617715075042 | 0.01777482888672 | 0.34752237502729 | decreased |
| 95 | g__[Eubacterium]_saphenum_group | 0.00006725541018 | 0.00020952647018 | 0.32098765432099 | decreased |
| 96 | g__Bosea | 0.00012933732727 | 0.00044233365926 | 0.29239766081871 | decreased |
| 97 | g__unclassified_f__Lysobacteraceae | 0.00020693972363 | 0.00072170228617 | 0.28673835125448 | decreased |
| 98 | g__Novosphingobium | 0.00005690842400 | 0.00022116682963 | 0.25730994152047 | decreased |
| 99 | g__Selenomonas | 0.00198144785378 | 0.00812497089910 | 0.24387137854187 | decreased |
| 100 | g__Brucella | 0.00009312287563 | 0.00038413186199 | 0.24242424242424 | decreased |
| 101 | g__Peptoniphilus | 0.02619339551872 | 0.14672673092145 | 0.17851822469038 | decreased |
| 102 | g__Rikenellaceae_RC9_gut_group | 0.00003104095854 | 0.00017460539181 | 0.17777777777778 | decreased |
| 103 | g__Lentimicrobium | 0.00004656143782 | 0.00032593006472 | 0.14285714285714 | decreased |
| 104 | g__Dermabacter | 0.00010346986182 | 0.00082646552126 | 0.12519561815336 | decreased |
| 105 | g__Cardiobacterium | 0.00007760239636 | 0.00068678120780 | 0.11299435028249 | decreased |
| 106 | g__unclassified_o__Enterobacterales | 0.00021728670981 | 0.00193229966941 | 0.11244979919679 | decreased |
| 107 | g__Bacillus | 0.00006208191709 | 0.00072170228617 | 0.08602150537634 | decreased |
| 108 | g__Lactococcus | 0.00000517349309 | 0.00009312287563 | 0.05555555555556 | decreased |
| 109 | g__Lactobacillus | 0.00000517349309 | 0.00017460539181 | 0.02962962962963 | decreased |
| 110 | g__Bryobacter | 0.00000000000000 | 0.00001164035945 | 0.00000000000000 | decreased |
| 111 | g__Brevibacterium | 0.00000000000000 | 0.00012804395400 | 0.00000000000000 | decreased |
| 112 | g__Brachybacterium | 0.00000000000000 | 0.00002328071891 | 0.00000000000000 | decreased |
| 113 | g__Microbacterium | 0.00000000000000 | 0.00005820179727 | 0.00000000000000 | decreased |
| 114 | g__unclassified_f__Nocardioidaceae | 0.00000000000000 | 0.00108255342925 | 0.00000000000000 | decreased |
| 115 | g__Actinomycetospora | 0.00000000000000 | 0.00045397401872 | 0.00000000000000 | decreased |
| 116 | g__Eperythrozoon | 0.00000000000000 | 0.00006984215673 | 0.00000000000000 | decreased |
| 117 | g__unclassified_c__Bacilli | 0.00000000000000 | 0.00009312287563 | 0.00000000000000 | decreased |
| 118 | g__unclassified_f__Oscillospiraceae | 0.00000000000000 | 0.00003492107836 | 0.00000000000000 | decreased |
| 119 | g__unclassified_f__Ruminococcaceae | 0.00000000000000 | 0.00012804395400 | 0.00000000000000 | decreased |
| 120 | g__W5053 | 0.00000000000000 | 0.00004656143782 | 0.00000000000000 | decreased |
| 121 | g__Romboutsia | 0.00000000000000 | 0.00013968431345 | 0.00000000000000 | decreased |
| 122 | g__Terrimonas | 0.00000000000000 | 0.00004656143782 | 0.00000000000000 | decreased |
| 123 | g__norank_f__Chitinophagaceae | 0.00000000000000 | 0.00009312287563 | 0.00000000000000 | decreased |
| 124 | g__Algoriphagus | 0.00000000000000 | 0.00005820179727 | 0.00000000000000 | decreased |
| 125 | g__Allomeiothermus | 0.00000000000000 | 0.00001164035945 | 0.00000000000000 | decreased |
| 126 | g__norank_f__Saccharimonadaceae | 0.00000000000000 | 0.00011640359454 | 0.00000000000000 | decreased |
| 127 | g__unclassified_o__Saccharimonadales | 0.00000000000000 | 0.00012804395400 | 0.00000000000000 | decreased |
| 128 | g__Devosia | 0.00000000000000 | 0.00087302695907 | 0.00000000000000 | decreased |
| 129 | g__Caldimonas | 0.00000000000000 | 0.00009312287563 | 0.00000000000000 | decreased |
| 130 | g__Comamonas | 0.00000000000000 | 0.00103599199143 | 0.00000000000000 | decreased |
| 131 | g__Methylotenera | 0.00000000000000 | 0.00013968431345 | 0.00000000000000 | decreased |
| 132 | g__Vibrio | 0.00000000000000 | 0.00004656143782 | 0.00000000000000 | decreased |
| 133 | g__Legionella | 0.00000000000000 | 0.00012804395400 | 0.00000000000000 | decreased |

**Table S6** Multiple linear regression analysis of variables affecting microbiota dysbiosis index in the nasal lavage fluid

| Variables | MDI | | | | |
| --- | --- | --- | --- | --- | --- |
|  | B | SE | Beta | *P* value |
| Male/Female | 0.026 | 0.206 | 0.017 | 0.900 |
| Age, years | 0.020 | 0.008 | 0.362 | 0.018 |
| Control/Cluster 1 | 0.738 | 0.290 | 0.491 | 0.016 |
| Control/Cluster 2 | 0.081 | 0.252 | 0.051 | 0.749 |
| Adjusted R2 | 0.471 | | | | |

**Abbreviations:** B, regression coefficient; Beta, standardized regression coefficient; MDI, Microbial Dysbiosis index; SE, standard error.

**Figures**


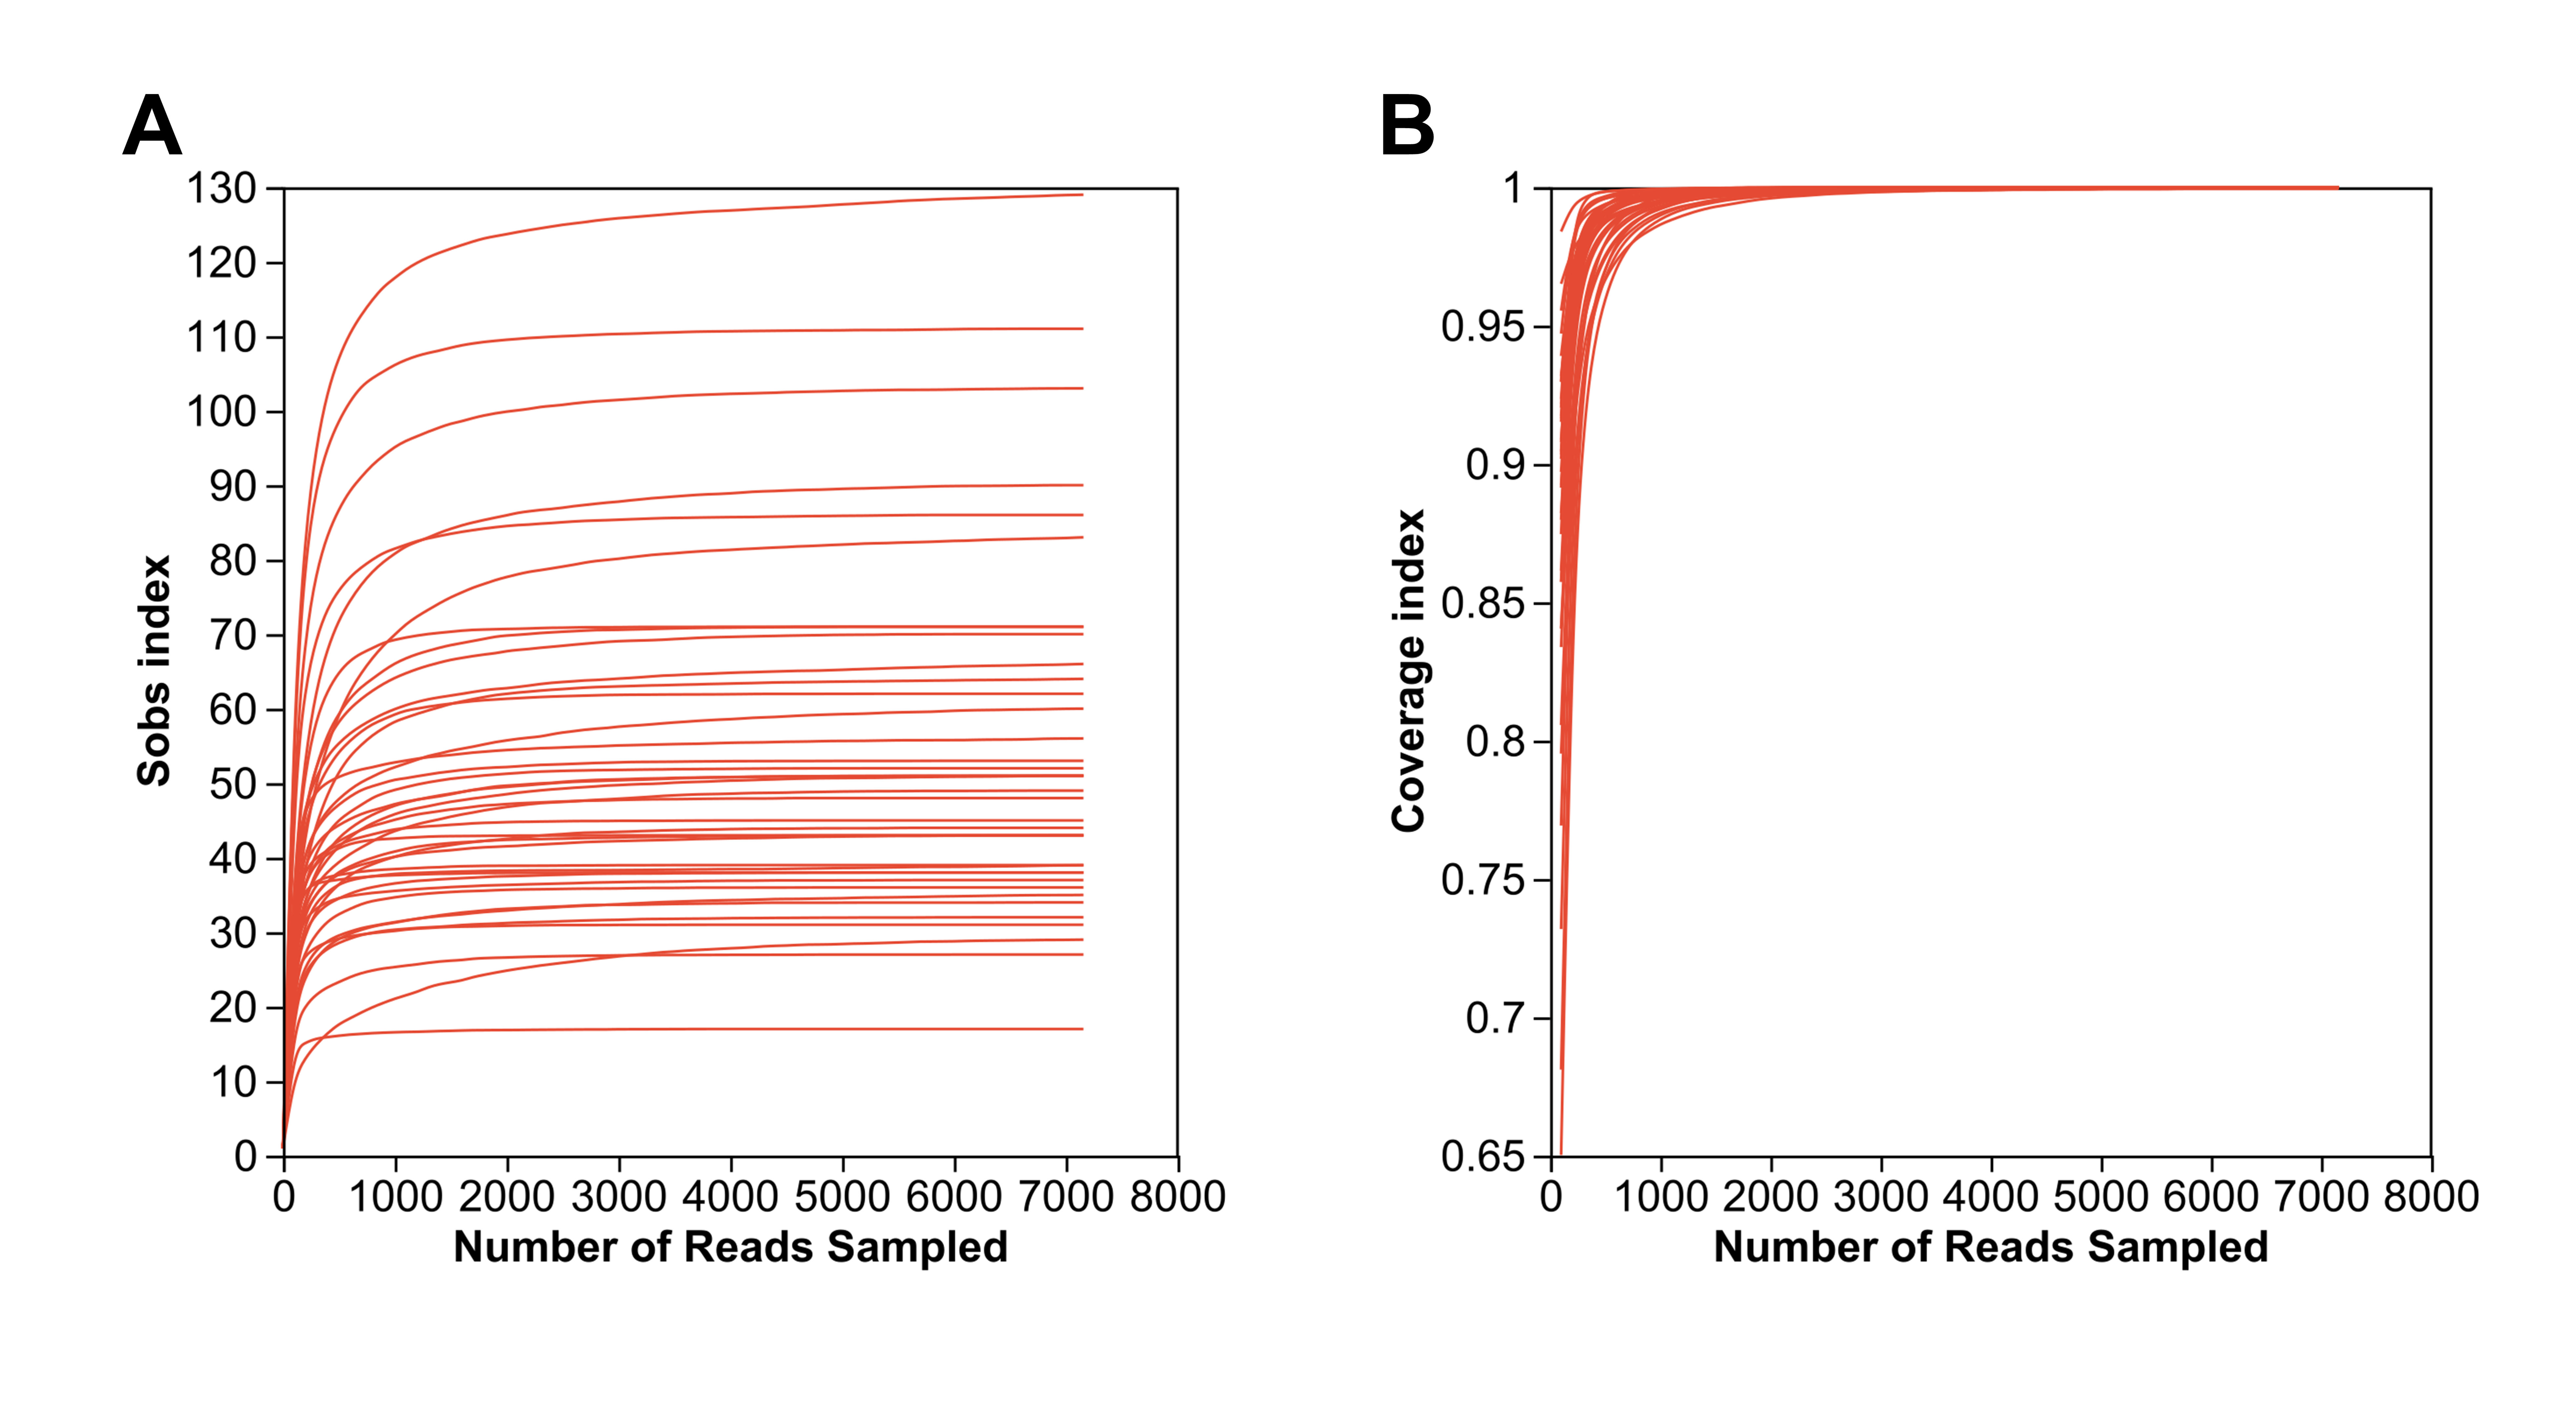


**Figure S1** Rarefaction curves of (A) Sobs and (B) Coverage index of 39 nasal lavage fluid samples at the ASV level.

ASV, amplicon sequence variant.


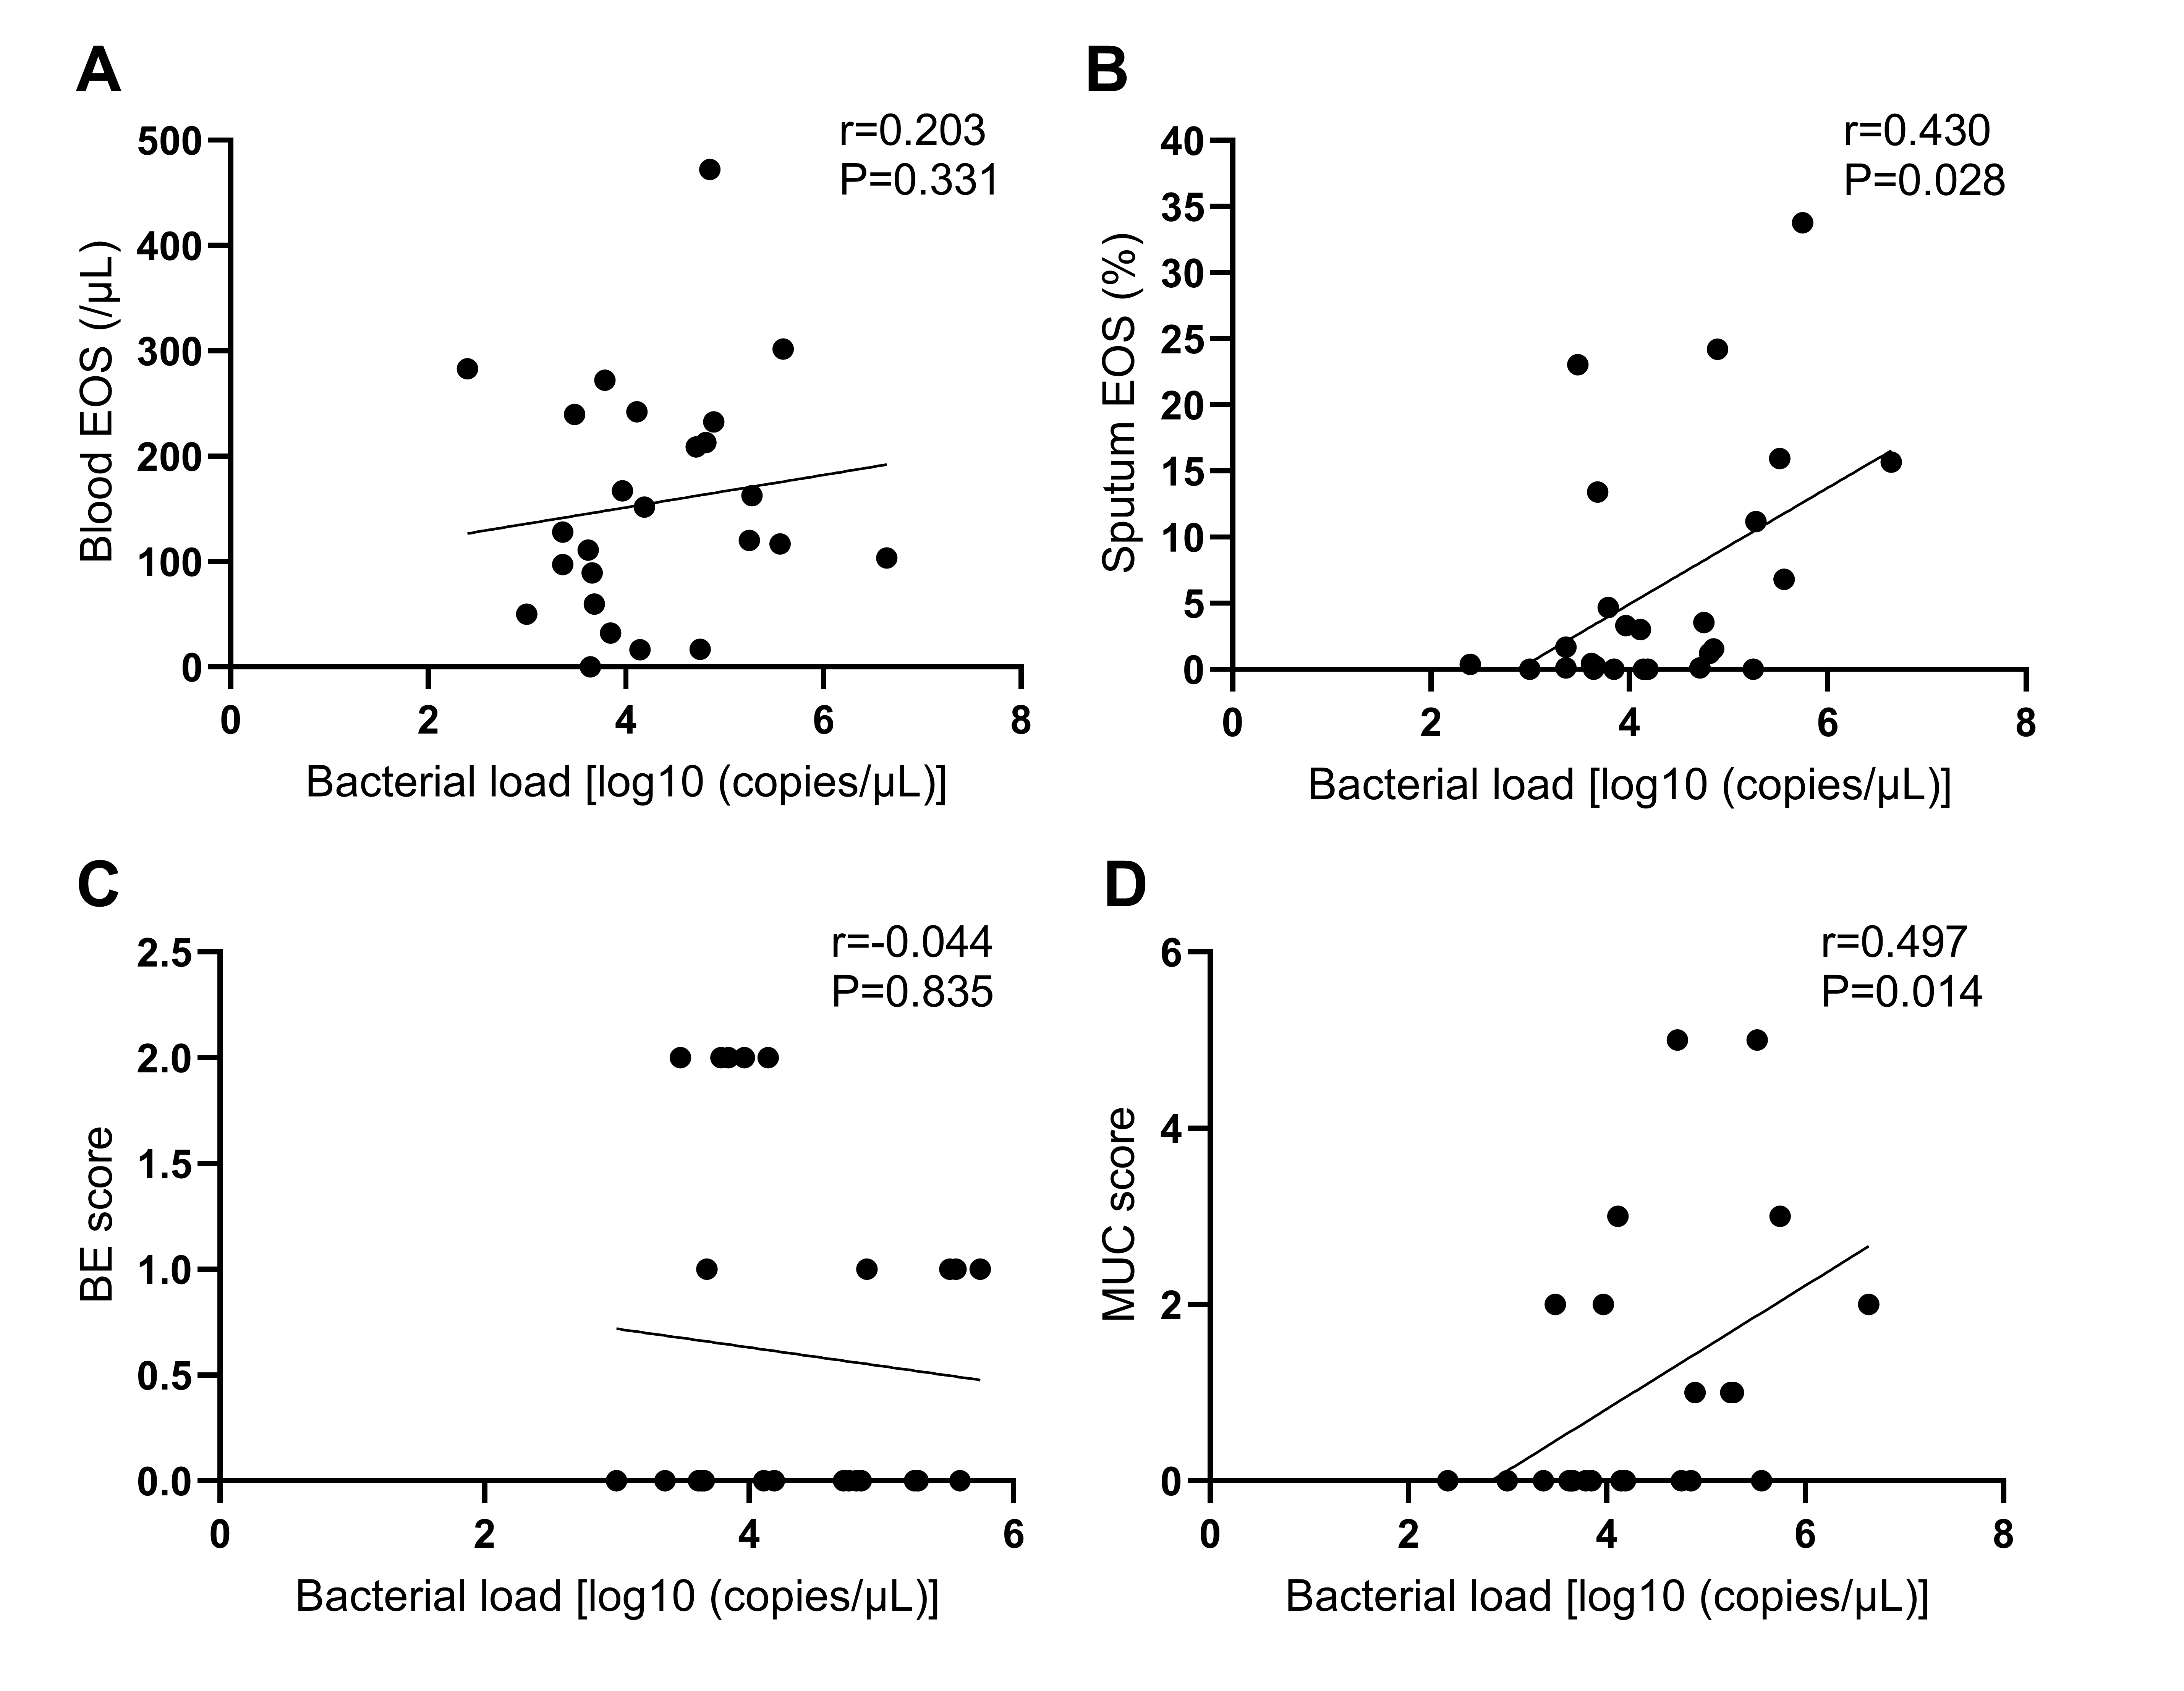


**Figure S2** Correlations between sputum eosinophil percentage and bacterial load after excluding extreme values.


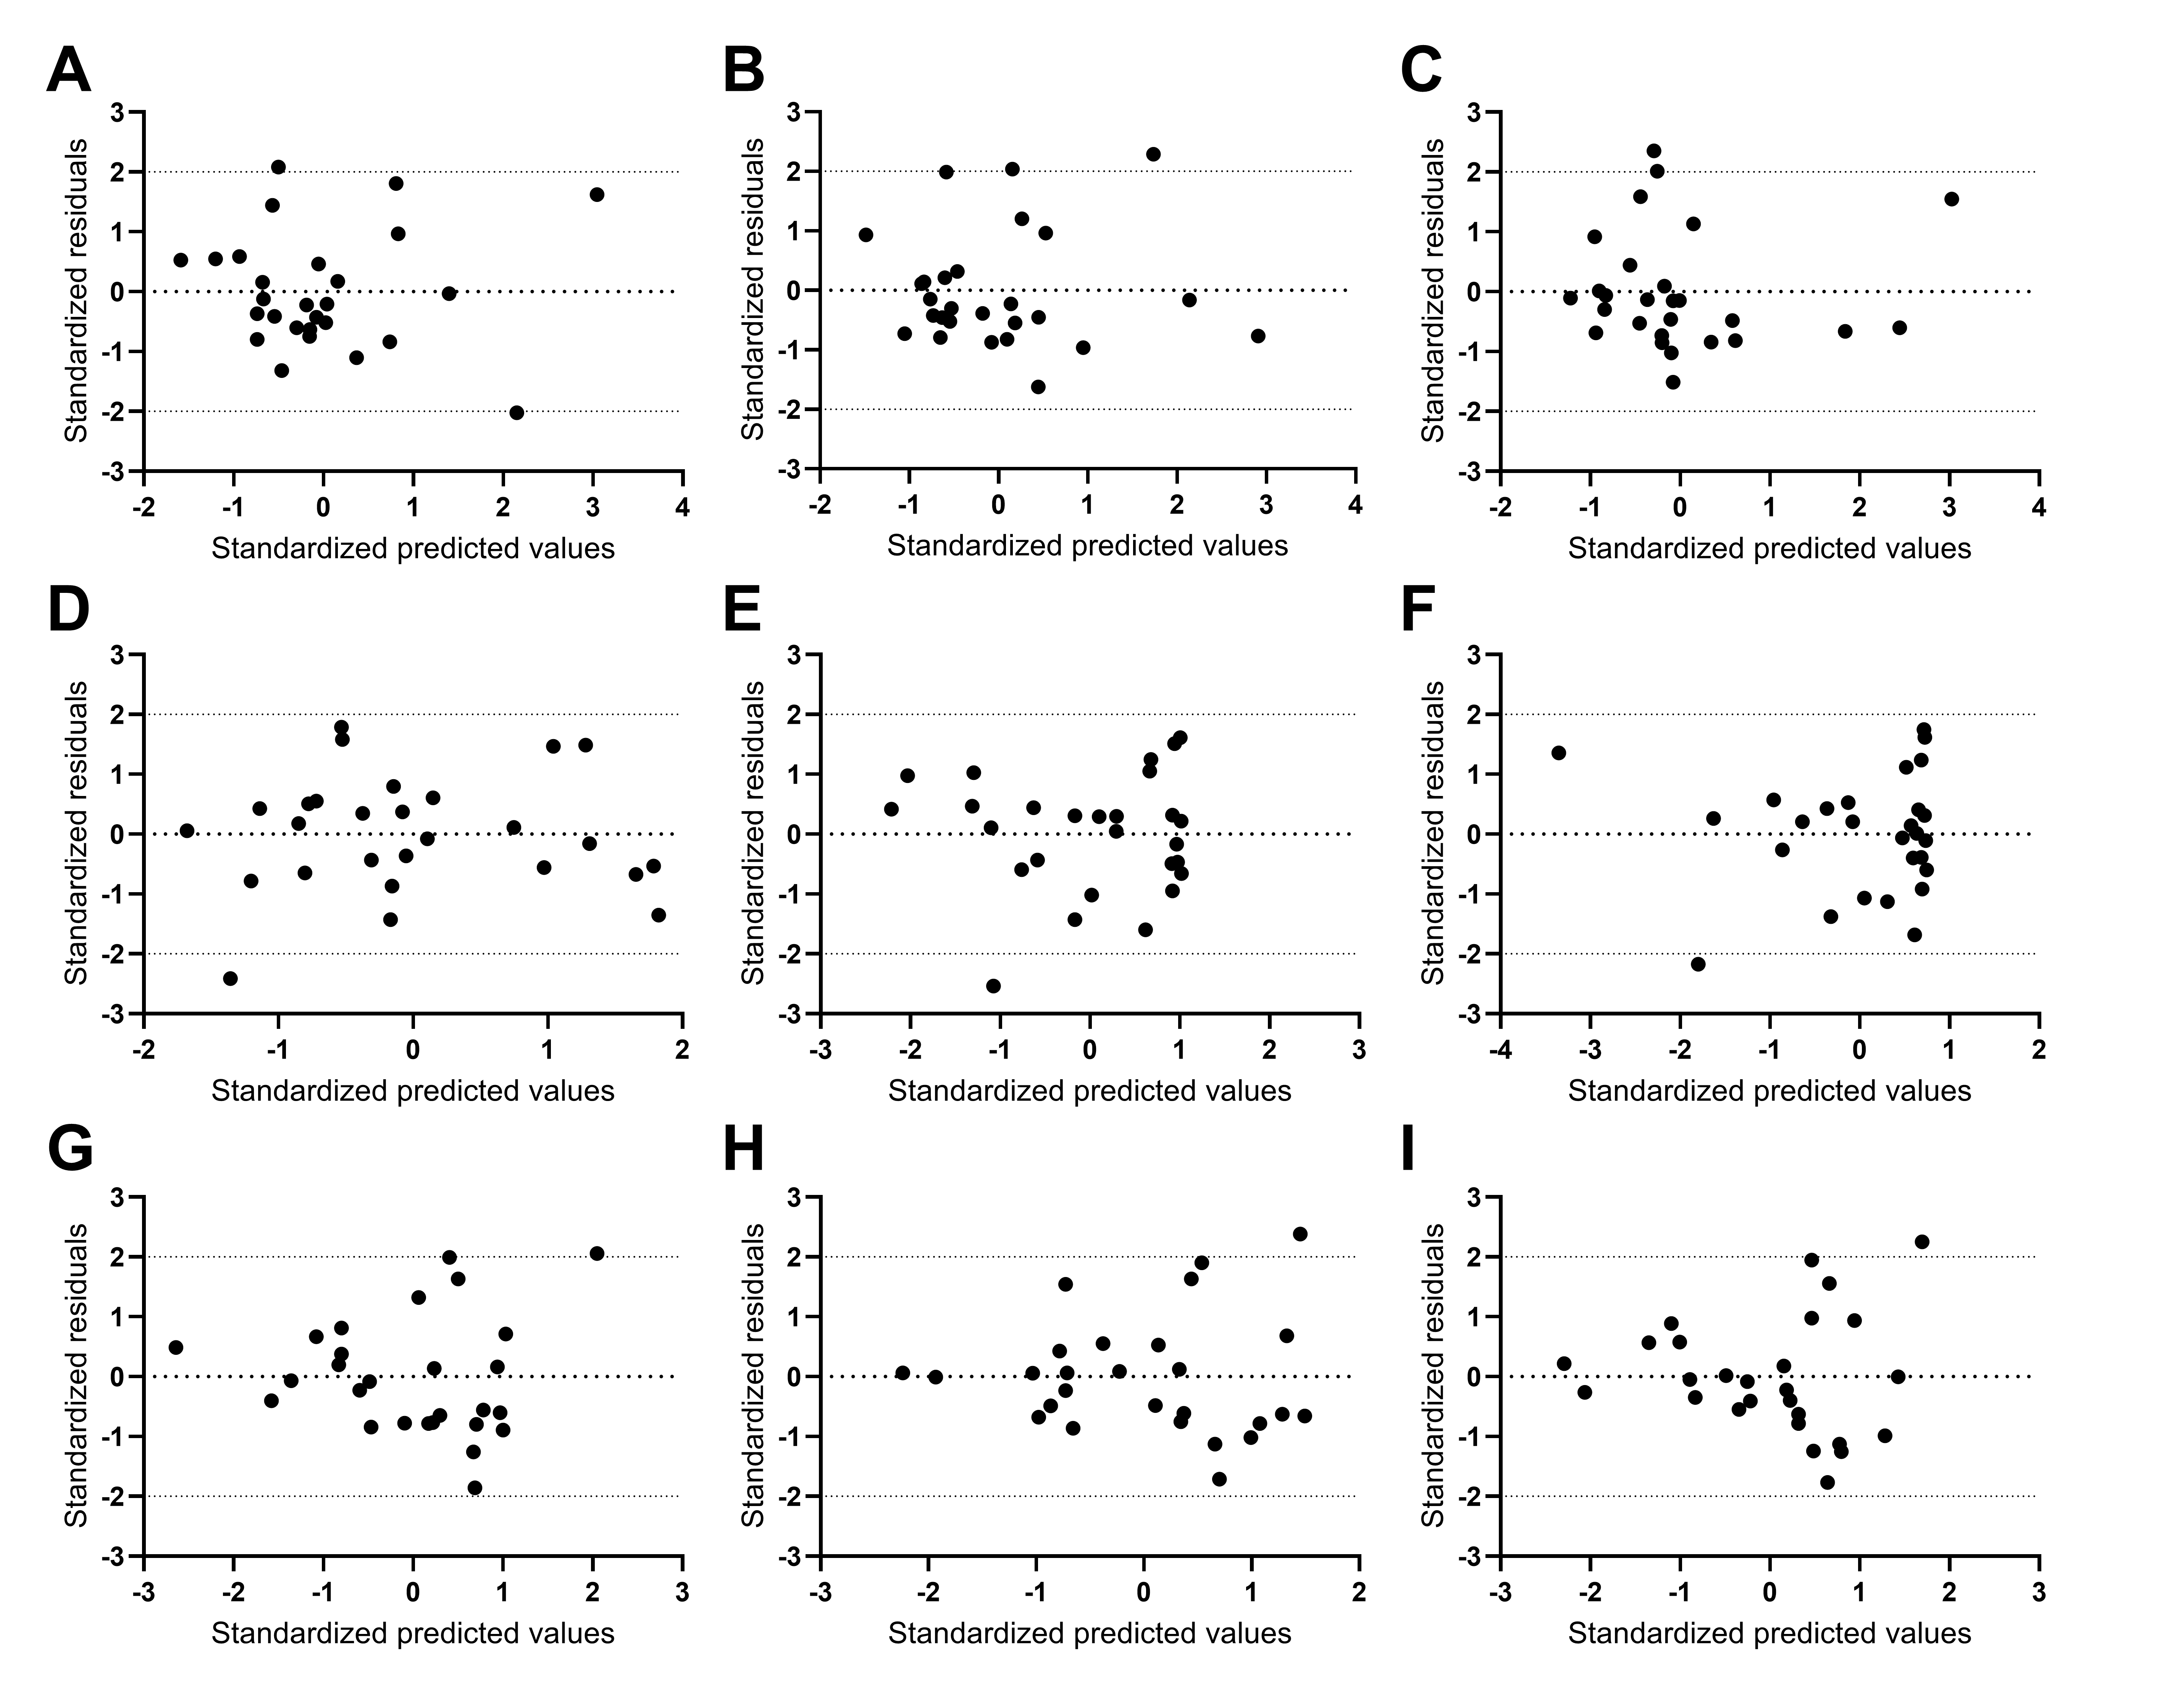


**Figure S3** Scatter plots of standardized residuals against standardized predicted values from linear regression models. The residual diagnostic plot respectively derived from the linear regression models of (A) Chao and LD-B0/BSA, (B) Chao and LD-B3/BSA, (C) Chao and LD-B4/BSA, (D) Shannon and WA%-B1, (E) Shannon and LAA%-910, (F) Shannon and LAA%-950, (G) Chao and FEV1, (H) Chao and FVC, (I) Chao and MEF75/25.

B0-B4 represented the trachea, main bronchus, lobar bronchus, segmental bronchus, and subsegmental bronchus of the lung, respectively. BSA, body surface area; FEV1, forced expiratory volume in 1s; FVC, forced vital capacity; LAA%-950, the percentages of low attenuation area below -950 Hounsfield Units; LAA%-910, the percentages of low attenuation area below -910 Hounsfield Units; LD, lumen diameter; MEF, mid-expiratory flow velocity; WA%, wall area percentage.


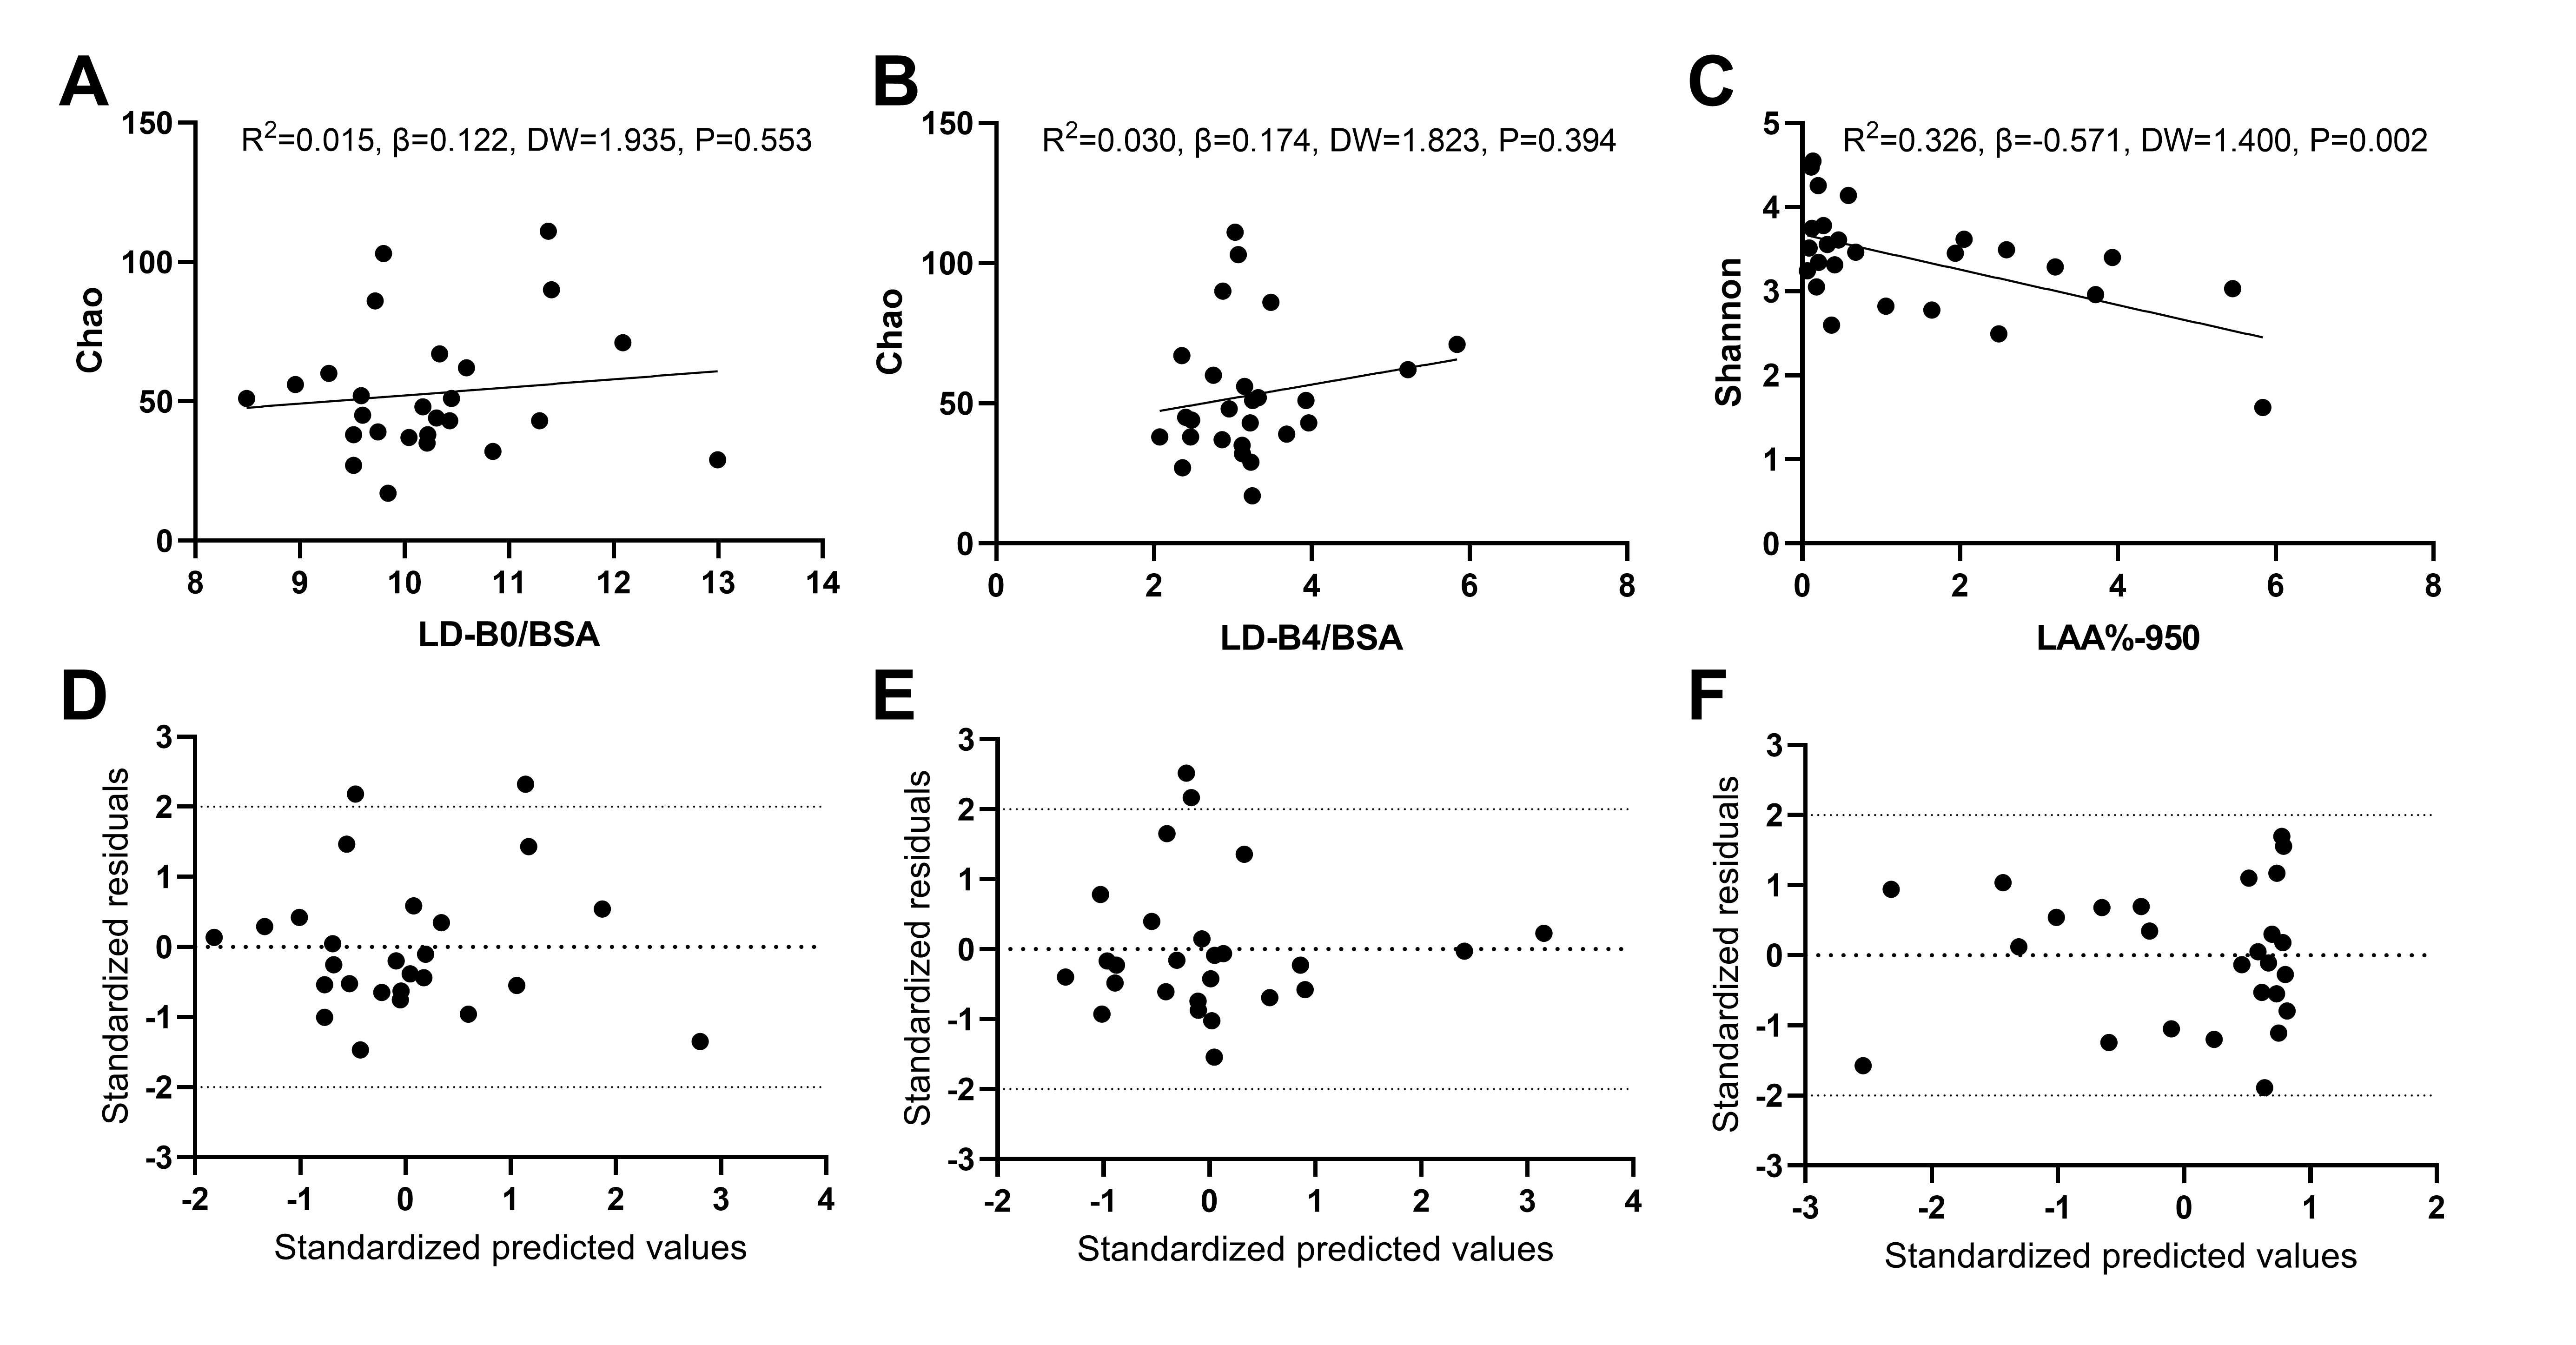


**Figure S4** Linear regression analyses after excluding outliers and corresponding residual diagnostics for homoscedasticity assessment. Linear regression analysis showing the relationship between (A) Chao and LD-B0/BSA, (B) Chao and LD-B4/BSA, (C) Shannon and LAA%-950. (D), (E), and (F) Scatter plots of standardized residuals against standardized predicted values derived from the model in (A), (B), and (C), respectively.

B0-B4 represented the trachea, main bronchus, lobar bronchus, segmental bronchus, and subsegmental bronchus of the lung, respectively. BSA, body surface area; DW, Durbin‑Watson; LAA%-950, the percentages of low attenuation area below -950 Hounsfield Units; LD, lumen diameter.
